# Supplementary material
Source: MDPI journal article supplement (https://www.mdpi.com/1999-4907/8/6/197)
Supplement: s1 [file s1]

Tab. S1. Mean values of physical and chemical soil properties under different land use types.

| Land use | P | R | F | *p* value |
| --- | --- | --- | --- | --- |
| Soil variable |  |  |  |  |
| pH | 7.70b | 7.77b | 8.11a | 0.050 |
| BD (g cm-3) | 1.05b | 1.27a | 1.18a | 0.001 |
| Sand (g kg-1) | 243a | 244a | 215b | 0.050 |
| Silt (g kg-1) | 234a | 218b | 221b | 0.050 |
| Clay (g kg-1) | 545ab | 526b | 560a | 0.050 |
| Carbonates (g kg-1) | 112b | 110b | 173a | 0.010 |
| SOC (g kg-1) | 25.7c | 30.0b | 56.5a | 0.001 |
| TN (g kg-1) | 1.44b | 1.53b | 2.52a | 0.001 |
| HC (g kg-1) | 5.4b | 7.0 b | 21.7a | 0.001 |
| C:N | 17.25b | 17.3b | 20.0a | 0.001 |
| HC:SOC (%) | 17.3b | 18.2b | 33.0a | 0.001 |
| SOCs (t ha-1) | 82.5b | 80.9b | 103.4a | 0.001 |

P: prairie; R: reforestation; F: multilayered forest. BD is soil bulk density, Sk is the skeletal, SOC is soil organic carbon, TN is total nitrogen, HC is humic carbon, SOCs is SOC stock. The lowercase letters behind numbers represent values significantly different for P < 0.05 using Student-Newman-Keuls test.

Tab. S2. Mean values of physical and chemical soil properties per depth.

| Horizon | Ah/Ap | B | CB | Ck | *p* value |
| --- | --- | --- | --- | --- | --- |
| Soil variable |  |  |  |  |  |
| pH | 7.00c | 7.93b | 8.09b | 8.37a | 0.050 |
| BD (g cm-3) | 0.36c | 1.11b | 1.26b | 1.35a | 0.001 |
| Sand (g kg-1) | 273a | 227b | 213b | 217b | 0.050 |
| Silt (g kg-1) | 233 | 227 | 220 | 210 | 0.100 |
| Clay (g kg-1) | 460b | 553a | 567a | 573a | 0.050 |
| Carbonates (g kg-1) | 16d | 59c | 201b | 240a | 0.050 |
| SOC (g kg-1) | 74.6a | 50.3b | 17.6c | 7.1d | 0.001 |
| TN (g kg-1) | 3.31a | 2.51a | 0.90b | 0.61b | 0.001 |
| HC (g kg-1) | 31.1a | 9.2b | 4.4b | 0.8c | 0.001 |
| C:N | 21.83a | 19.6b | 19.4b | 11.53c | 0.010 |
| HC:SOC (%) | 39.5a | 16.3b | 22.3b | 12.9c | 0.010 |
| SOCs (t ha-1) | 43.71b | 227.89a | 54.88b | 29.38c | 0.001 |

BD is soil bulk density, Sk is the skeletal, SOC is soil organic carbon, TN is total nitrogen, HC is humic carbon, SOCs is SOC stock. The lowercase letters behind numbers represent values significantly different for P < 0.05 using Student-Newman-Keuls test.
